# Supplementary material for: On the effectiveness of recession analysis methods for capturing thecharacteristic storage-discharge relation: An intercomparison study
Source: Copernicus journal article supplement (doi:10.5194/hess-2018-65), 2018-02-19
Supplement: Supplementary file 1 [file hess-2018-65-supplement.pdf]

*Table S1 Average  $wr^2$  for all watersheds obtained using LEM with different  $c$  values*

| <b>c values</b> | $Q$   | pdf $Q$ | pdf $HQ$ | pdf $LQ$ |
|-----------------|-------|---------|----------|----------|
| c=2             | 0.048 | 0.310   | 0.583    | 0.004    |
| c=1             | 0.064 | 0.400   | 0.700    | 0.050    |
| c=0.5           | 0.093 | 0.424   | 0.729    | 0.064    |

*Table S2 Total ranks based on NSE, logNSE, RMSE and R<sup>2</sup> for the four recession analysis methods for synthetic data*

| <i>Total ranks based on NSE</i>    |          |             |              |              |                                    |             |              |              |
|------------------------------------|----------|-------------|--------------|--------------|------------------------------------|-------------|--------------|--------------|
| <i>Total ranks (level 1 noise)</i> |          |             |              |              | <i>Total ranks (level 2 noise)</i> |             |              |              |
| <b>Method</b>                      | <i>Q</i> | <i>pdfQ</i> | <i>pdfHQ</i> | <i>pdfLQ</i> | <i>Q</i>                           | <i>pdfQ</i> | <i>pdfHQ</i> | <i>pdfLQ</i> |
| LEM                                | 159      | 160         | 153          | 165          | 147                                | 151         | 151          | 154          |
| CTM                                | 144      | 147         | 150          | 136          | 157                                | 153         | 153          | 142          |
| IBM                                | 74       | 74          | 68           | 78           | 70                                 | 76          | 77           | 75           |
| EBM                                | 73       | 69          | 79           | 71           | 76                                 | 70          | 69           | 79           |

  

| <i>Total ranks based on logNSE</i> |          |             |              |              |                                    |             |              |              |
|------------------------------------|----------|-------------|--------------|--------------|------------------------------------|-------------|--------------|--------------|
| <i>Total ranks (level 1 noise)</i> |          |             |              |              | <i>Total ranks (level 2 noise)</i> |             |              |              |
| <b>Method</b>                      | <i>Q</i> | <i>pdfQ</i> | <i>pdfHQ</i> | <i>pdfLQ</i> | <i>Q</i>                           | <i>pdfQ</i> | <i>pdfHQ</i> | <i>pdfLQ</i> |
| LEM                                | 155      | 153         | 145          | 158          | 147                                | 151         | 155          | 152          |
| CTM                                | 143      | 138         | 151          | 135          | 143                                | 147         | 148          | 141          |
| IBM                                | 82       | 80          | 77           | 83           | 84                                 | 79          | 73           | 78           |
| EBM                                | 70       | 79          | 77           | 74           | 76                                 | 73          | 74           | 79           |

  

| <i>Total ranks based on RMSE</i>   |          |             |              |              |                                    |             |              |              |
|------------------------------------|----------|-------------|--------------|--------------|------------------------------------|-------------|--------------|--------------|
| <i>Total ranks (level 1 noise)</i> |          |             |              |              | <i>Total ranks (level 2 noise)</i> |             |              |              |
| <b>Method</b>                      | <i>Q</i> | <i>pdfQ</i> | <i>pdfHQ</i> | <i>pdfLQ</i> | <i>Q</i>                           | <i>pdfQ</i> | <i>pdfHQ</i> | <i>pdfLQ</i> |
| LEM                                | 159      | 160         | 153          | 165          | 147                                | 151         | 151          | 154          |
| CTM                                | 144      | 147         | 150          | 136          | 157                                | 153         | 153          | 142          |
| IBM                                | 74       | 74          | 68           | 78           | 70                                 | 76          | 77           | 75           |
| EBM                                | 73       | 69          | 79           | 71           | 76                                 | 70          | 69           | 79           |

  

| <i>Total ranks based on R<sup>2</sup></i> |          |             |              |              |                                    |             |              |              |
|-------------------------------------------|----------|-------------|--------------|--------------|------------------------------------|-------------|--------------|--------------|
| <i>Total ranks (level 1 noise)</i>        |          |             |              |              | <i>Total ranks (level 2 noise)</i> |             |              |              |
| <b>Method</b>                             | <i>Q</i> | <i>pdfQ</i> | <i>pdfHQ</i> | <i>pdfLQ</i> | <i>Q</i>                           | <i>pdfQ</i> | <i>pdfHQ</i> | <i>pdfLQ</i> |
| LEM                                       | 162      | 136         | 144          | 156          | 151                                | 139         | 152          | 150          |
| CTM                                       | 138      | 137         | 147          | 137          | 149                                | 151         | 152          | 149          |
| IBM                                       | 77       | 84          | 80           | 85           | 73                                 | 84          | 72           | 77           |
| EBM                                       | 73       | 93          | 79           | 72           | 77                                 | 76          | 74           | 74           |

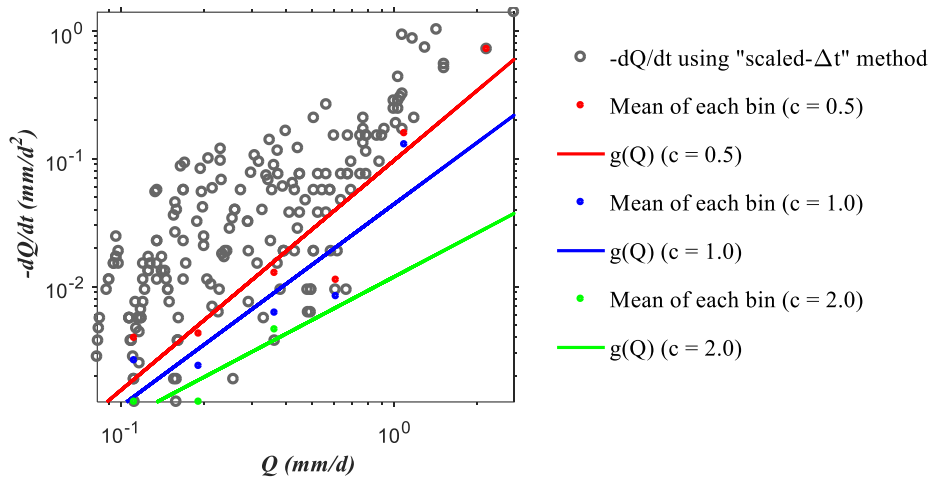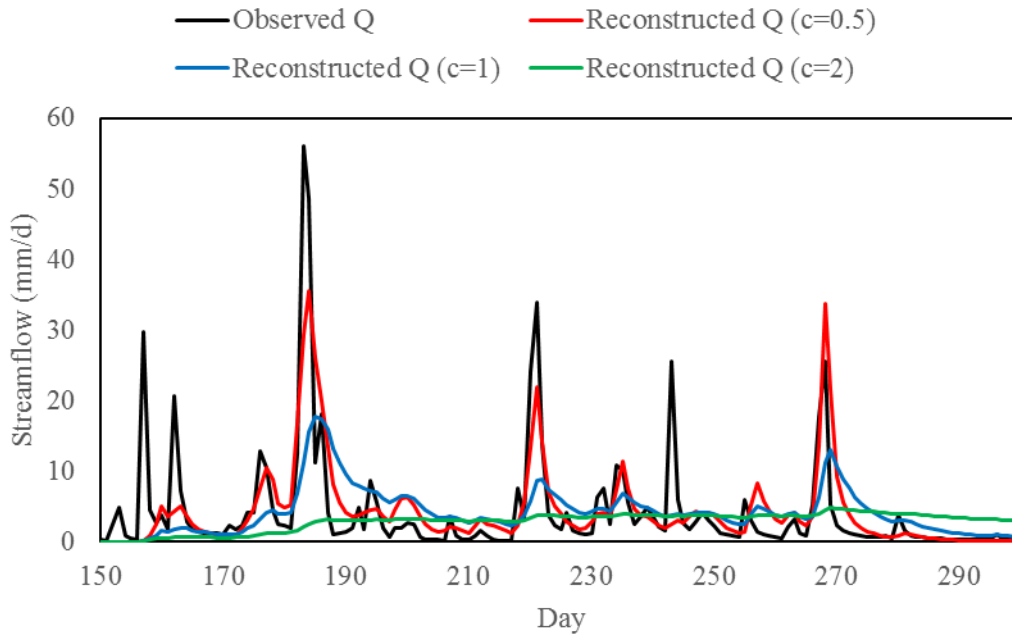

**Figure S1**  $g(Q)$  and the corresponding reconstructed streamflow obtained using different  $c$  values in LEM method
